# Supplementary material
Source: HighWire-hosted journal article supplement (https://dmd.aspetjournals.org/highwire/filestream/65970/field_highwire_adjunct_files/5/DMD35113Sup_text.pdf)
Supplement: DMD35113Sup_text.pdf [file DMD35113Sup_text.pdf]

## **Drug Metabolism and Disposition**

### **A PREDICTIVE LIGAND-BASED BAYESIAN MODEL FOR HUMAN DRUG INDUCED LIVER INJURY**

Sean Ekins, Antony J. Williams and Jinghai J. Xu

Collaborations in Chemistry, 601 Runnymede Avenue, Jenkintown, PA 19046, U.S.A. (SE)

Department of Pharmaceutical Sciences, University of Maryland, MD 21201, U.S.A. (SE)

Department of Pharmacology, University of Medicine & Dentistry of New Jersey (UMDNJ)-Robert Wood Johnson Medical School,  
675 Hoes Lane, Piscataway, NJ 08854. (SE)

Royal Society of Chemistry, 904 Tamaras Circle, Wake Forest, NC-27587. (AJW)

Merck & Co., Inc., 126 E. Lincoln Ave, Rahway, NJ 07065. (JJX)

## Supplemental Text

Each filter has a minimum and maximum number of times that it is allowed to map (in parentheses). The following SMARTS were used with default settings: Sulfonyl halide (0-1), Primary alkyl halide (0-1), Epoxide or aziridine (0-1), Sulfonate ester (0-1), Phosphonate ester (0-1), Long aliphatic chain (0-1), Peroxide (0-1), 1-2 Dicarbonyl (0-1), Acid halide (0-1), Non-Hydrogen atoms (2-35), Carbons (1-30), N-O-S (0-9), Sulfonyl halides (0-0), Acid halides (0-0), Alkyl halides (0-0), Acid anhydrides (0-0), Isocyanates or Isothiocyanates (0-0), Thiocyanates (0-0), Carbodiimides (0-0), Sulfonates (0-0), Acylhydrazides (0-0), Isonitriles (0-1), Imines (0-0), Acrylonitriles (0-0), Propenals (0-0), Macrocycles (0-0), Phosphorus 3 (0-0), Hexanes (0-0), 5 rotatable bonds (0-0), Aliphatic alcohols (0-3), Perchlorates (0-0), Fluorines (0-7), Cl-Br-I (0-3), P halides (0-0), Cyanohydrines (0-0), Sulfate esters (0-0), Pentafluorophenyl esters (0-0), Paranitrophenyl esters (0-0), HOBt esters (0-0), Lawesson's reagents (0-0), Phosphoramides (0-0), Aromatic azides (0-0), Quaternary C-Cl-I-P-S (0-0), Beta carbonyl quaternary N (0-0), Acyl cyanides (0-0), Sulfonyl cyanides (0-0), Thioepoxides (0-0), Benzylic quaternary N (0-0), Di or Triphosphates (0-0), Aminoxy-oxo (0-0), Nitros (0-1), N-halides (0-0), Aldehyde (0-1), Cyano (0-1), Acid halides (0-0), Carbazides (0-0), Sulfate esters (0-0), Sulfonates (0-0), Acid anhydrides (0-0), Peroxides (0-0), Pentafluorophenyl esters (0-0), Paranitrophenyl esters (0-0), Esters of HOBT (0-0), Isocyanates and Isothiocyanates (0-0), Triflates (0-0), Lawesson reagent and derivatives (0-0), Phosphoramides (0-0), Aromatic azides (0-0), Beta carbonyl quaternary Nitrogen (0-0), Acylhydrazide (0-0), Quaternary C or C1 or I or P or S (0-0), Phosphoranes (0-0), Nitroso (0-0), P or S Halides (0-0), Carbodiimide (0-0), Isonitrile (0-0), Triacyloximes (0-0), Cyanohydrins (0-0), Acyl cyanides (0-0), Sulfonyl cyanides (0-0),

Cyanophosphonates (0-0), Azocyanamides (0-0), Azoalkanes (0-0), Aliphatic methylene chains of 7 carbons or more in length (0-0), Compounds with 4 or more acidic groups (0-0), Crown ethers (0-0), Disulfides (0-0), Thiols (0-0), Epoxides or Thioepoxides or Aziridines (0-0), 2-4-5 trihydroxyphenyl (0-0), 2-3-4 trihydroxyphenyl (0-0), Hydrazothiourea (0-0), Thiocyanate (0-0), Benzylic quaternary Nitrogen (0-0), Thioesters (0-0), Cyanamides (0-0), Four numbered Lactones (0-0), Di and Triphosphates (0-0), Betalactams (0-0), Quinones (0-0), Polyenes (0-0), Saponin derivatives (0-0), Cytochalasin derivatives (0-0), Cycloheximide derivatives (0-0), Monensin derivatives (0-0), Cyanidin derivatives (0-0) and Squalen derivatives (0-0). A molecule must match this filter or it will be classed as failing the filter.
